# Supplementary material for: NRL−/− gene edited human embryonic stem cells generate rod‐deficient retinal organoids enriched in S‐cone‐like photoreceptors
Source: PubMed Central journal article supplement (PMC8438615; doi:10.1002/stem.3325), 2021-01-19
Supplement: STEM-39-414-s001.pdf [file STEM-39-414-s001.pdf]

A

|   | Sequence                                       | PAM | Score     | Gene            | Chr.  | Strand | Position  | Mismatches | On-target |
|---|------------------------------------------------|-----|-----------|-----------------|-------|--------|-----------|------------|-----------|
|   | CAGGCCTGGAGGAGCTGTAC                           | TGG | 100       | ENSG00000129535 | chr14 | -1     | 24082633  | 0          | FALSE     |
| 1 | CAGG <b>T</b> CTGGAGGAGCTGTAG                  | AAG | 5.6592857 |                 | chr9  | -1     | 132597790 | 2          | FALSE     |
| 2 | CAGGCCTG <b>T</b> AGGAGCTGT <b>C</b> C         | AGG | 1.6621977 | ENSG00000171298 | chr17 | 1      | 80104569  | 2          | FALSE     |
| 3 | CAGG <b>G</b> CTGG <b>G</b> GGAGCTGTAG         | AAG | 1.4741582 |                 | chr7  | -1     | 43197557  | 3          | FALSE     |
| 4 | <b>G</b> AAC <b>C</b> CT <b>A</b> GAGGAGCTGTAC | CAG | 1.4575207 |                 | chr1  | -1     | 6462730   | 4          | FALSE     |

### Off-target site #1

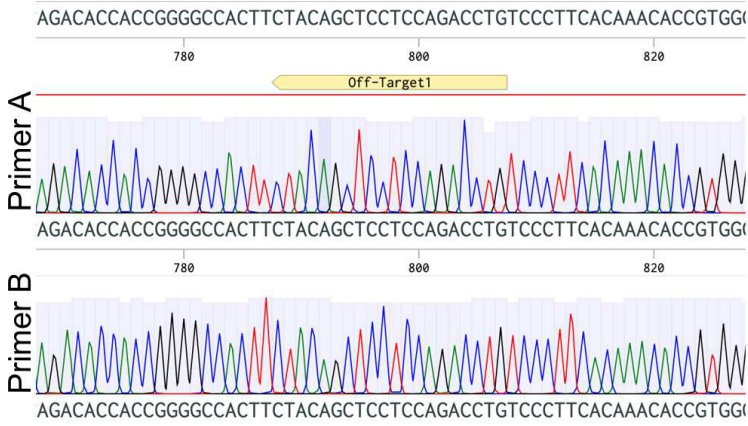

### Off-target site #3

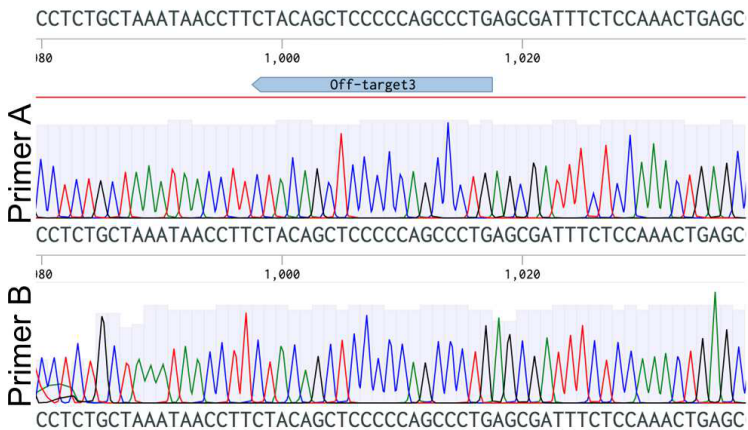

### Off-target site #4

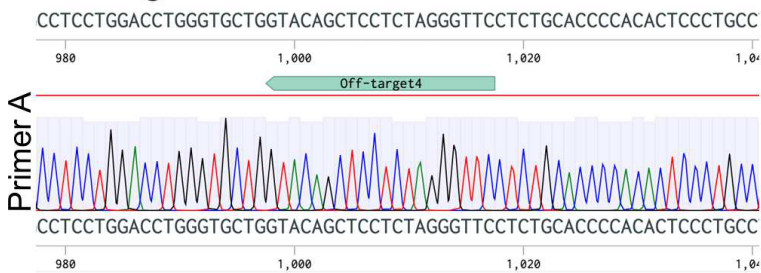

B

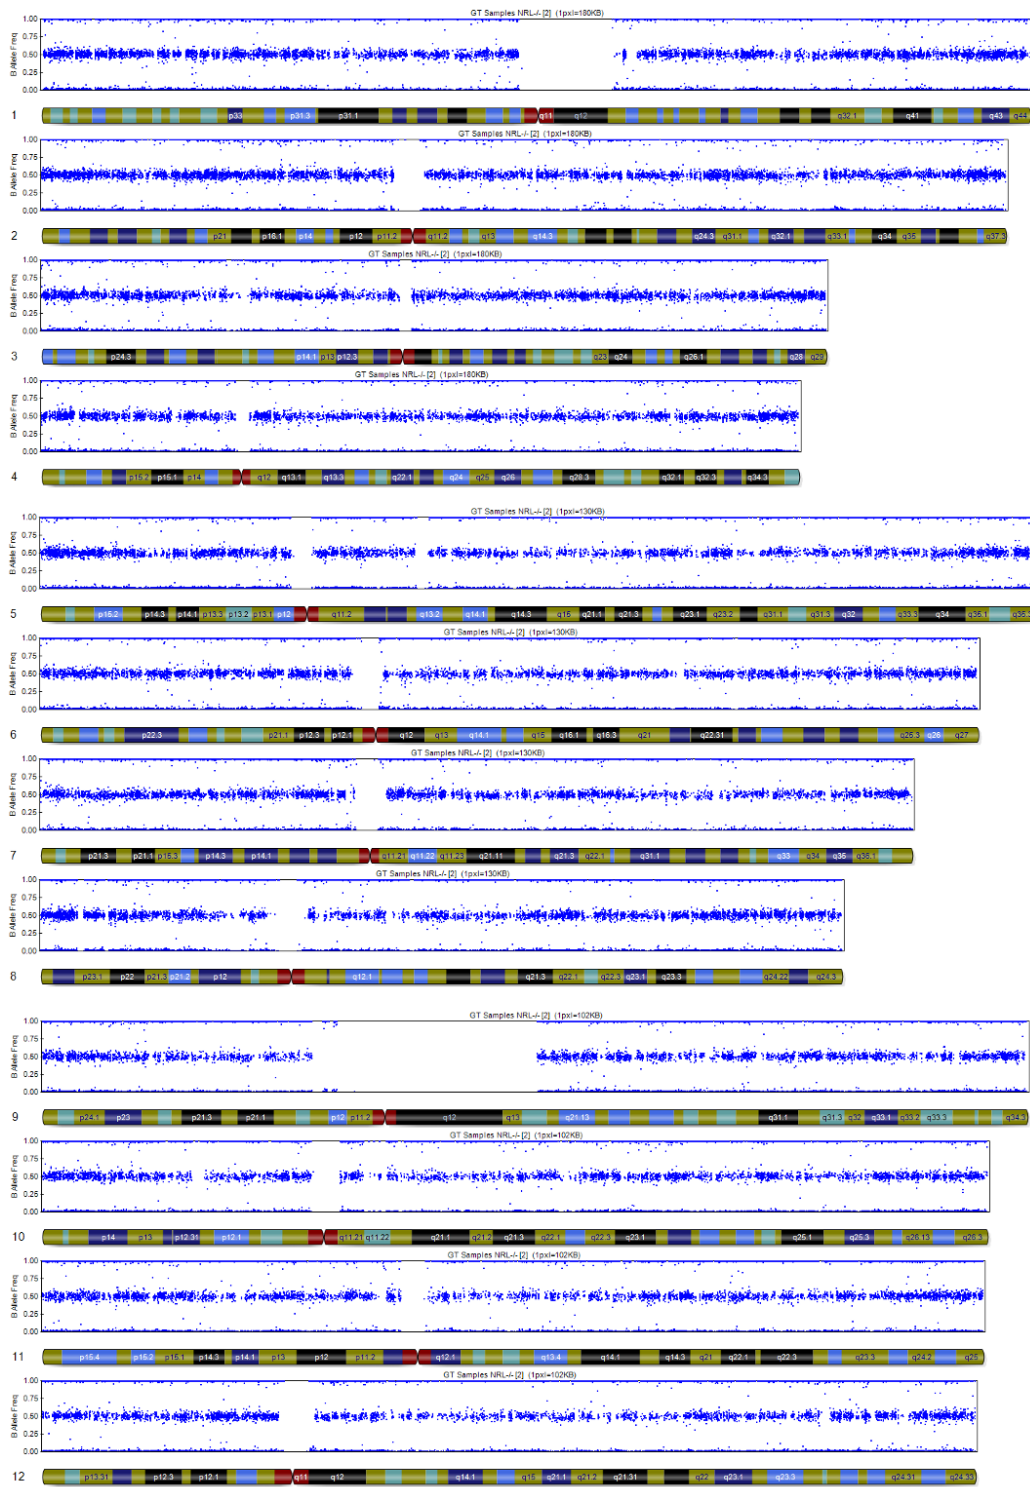

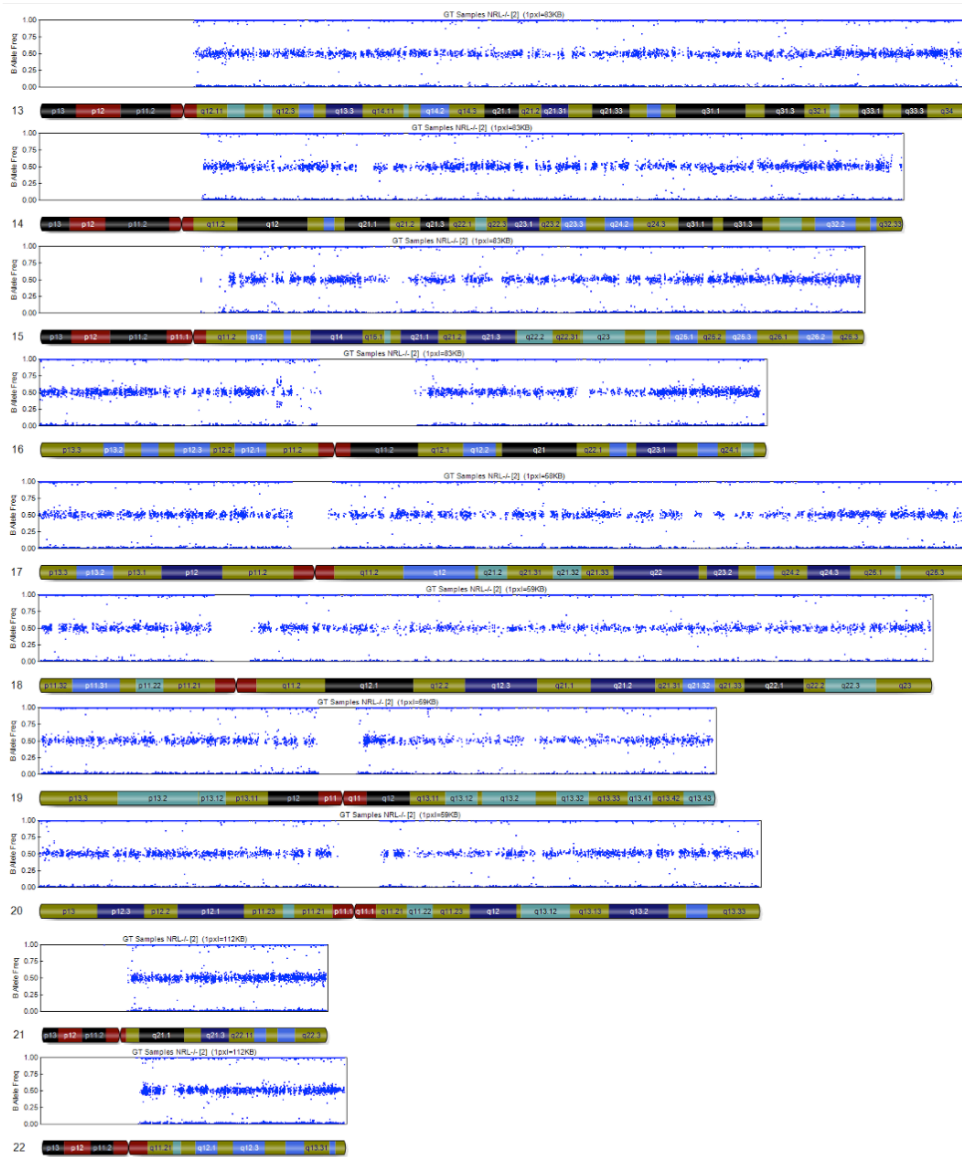

### Supplementary Figure 1. CRISPR off-target effects

**A.** The first four off target sites predicted for *NRL*<sup>-/-</sup> sgRNA were investigated by amplifying the genomic region via PCR; locations #1, #3 and #4 were amplified and analyzed using Sanger sequencing, with no mismatches observed. Region #2 proved difficult to amplify in edited and non edited genomic DNA.

**B.** SNP analysis of *NRL*<sup>-/-</sup> genomic DNA showing a normal karyotype; mapping from Genomestudio 2.0 shows individual SNP markers on the array plotted as a function of the frequency of the minor (B) allele across each chromosome.

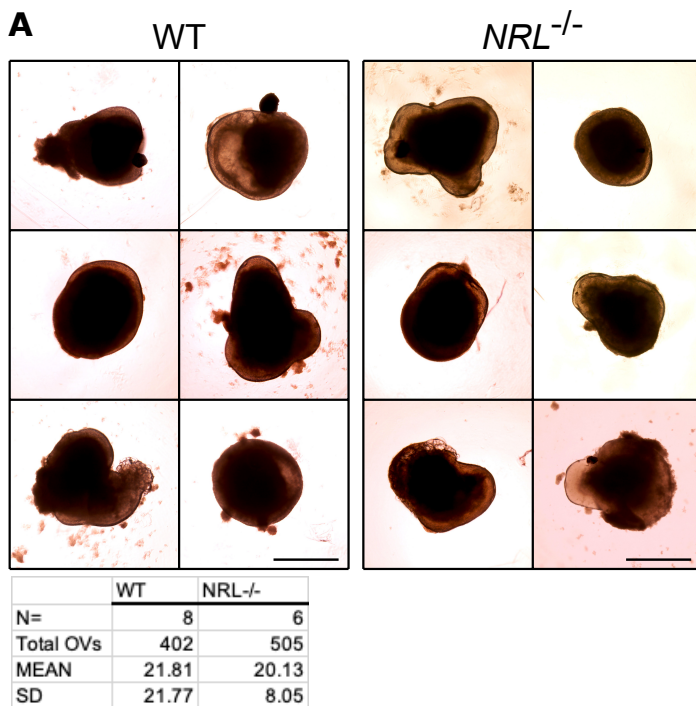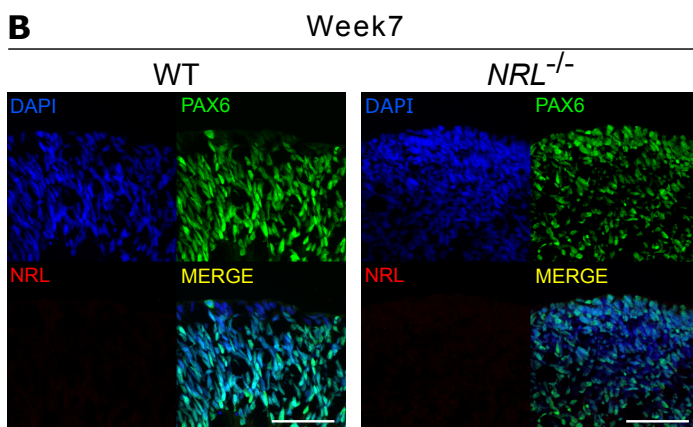

**Supplementary Figure 2. Representative examples of OVs at differentiation week 14 and NRL immunostaining in week 7 OVs**

**A.** Bright field images of WT and *NRL*<sup>-/-</sup> retinal organoids (OVs) at differentiation week 14 in culture, showing variable sizes and morphology; they can be round in shape, or with bulges and lobes, and RPE present. Table summarizes the average number of OVs generated per well (of a 6-well plate) with standard deviation (SD) from independent differentiation experiments (N). No evidence was found for a change in OV generation relative to genotype. **B.** Immunostaining of WT and *NRL*<sup>-/-</sup> OV sections at differentiation week 7, using early retinal marker PAX6, and NRL. Scale bars; A, 1 mm; B, 50  $\mu$ m.

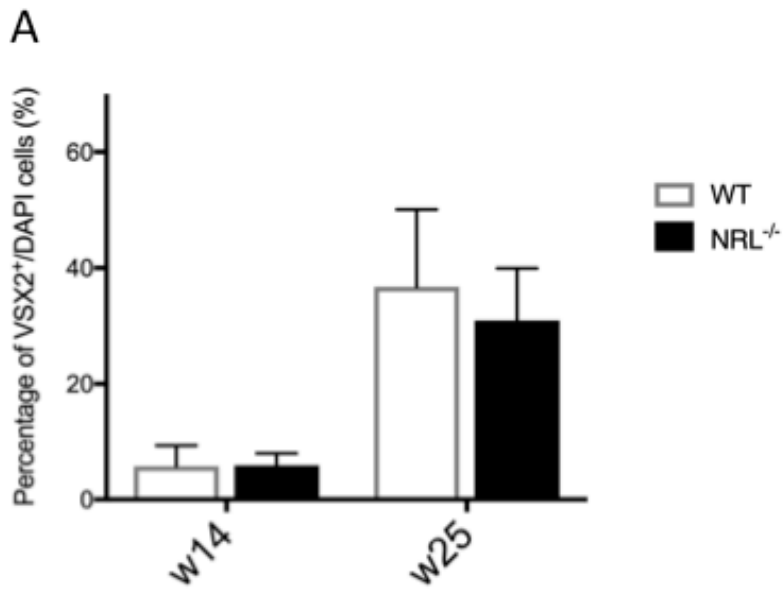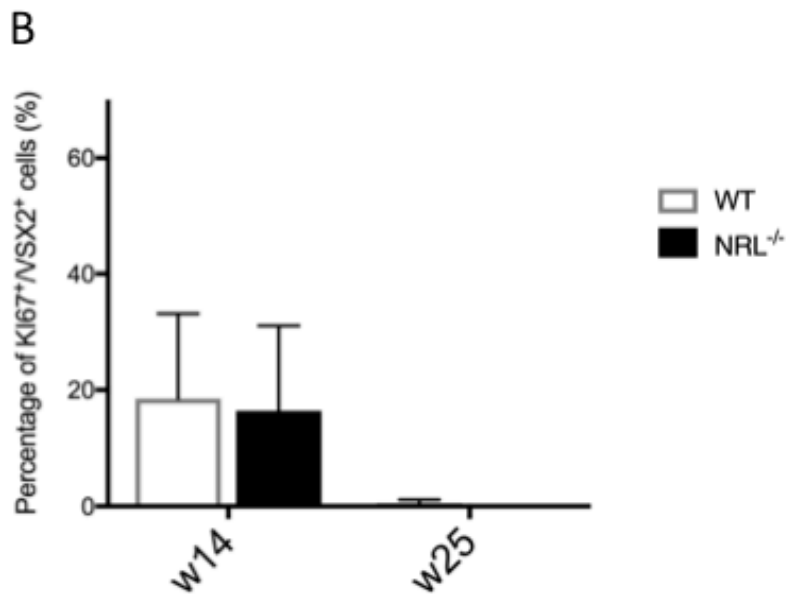

**Supplementary Figure 3. Proportion of VSX2+ progenitor cells at differentiation week 14 and 25 in WT and *NRL*<sup>-/-</sup> OVAs**

**A.** VSX2+ cells as a percentage of total cell nuclei labelled with DAPI; **B.** Percentage of Ki67+ cells as a percentage of VSX2+ cells, in WT and *NRL*<sup>-/-</sup> organoids at week 14 and week 25 (N = 1 differentiation and n = 3 organoids for each genotype). Mean ± SD. No significant difference between WT and *NRL*<sup>-/-</sup> OVAs.

## Supplementary Methods File

### Detailed Methods

#### ESC culture

The MShef10 embryonic stem cell line (hPSCreg Name, UOSe014-A) generated by the Centre for Stem Cell Biology, University of Sheffield<sup>34</sup> was cultured using standard procedure. Briefly, flasks of 6-well plates were coated with 5  $\mu\text{g/ml}$  Laminin521 (Biolamina, #LN521) in PBS (+Mg/+Ca<sup>2+</sup>, PBS Life Technologies, #14190-091) at 4°C O/N. Laminin solution was aspirated and the flask covered with pluripotency supportive NutriStem medium (Biological Industries, #05-100-1A). Cells were plated at a density of 10,000 cells/cm<sup>2</sup>, fed daily after the first 48 h, and usually passaged every five days, when ~80% confluency was reached. To lift the cells, semi-confluent cultures were washed twice with PBS (-Mg/-Ca<sup>2+</sup>, PBS Life Technologies #14190-094), and incubated with a 0.5 mM solution of EDTA (Life Technologies, #15575-020) in PBS<sup>-/-</sup> for 5 minutes at 37° C. Clusters of cells were detached by tapping the flask, resuspended in media, centrifuged for 5 minutes at 200g and counted for replating.

#### CRISPR/Cas9 gene ablation of *NRL*

To introduce a mutation in the *NRL* gene of MShef10 ESC cells, a small donor was designed to achieve HDR repair following Cas9 double strand break<sup>35</sup>; a phosphorylated 127 bp asymmetric single-stranded donor oligonucleotide (ssODN) (Biolegio) containing a 5 bp sequence change was used to insert a premature STOP codon at a.a. position 74 of *NRL* gene, and a novel EcoRI restriction site was also introduced to facilitate screening for donor integration. The Wellcome Sanger Institute Genome Editing CRISPR finder tool<sup>35</sup> was used to identify the sgRNA sequence (CAGGCCTGGAGGAGCTGTAC). The sgRNA

guide was selected to avoid an alternative translational start site, and with predicted off-target sites having at least two mismatches, reducing the chances of unspecific gene editing events. The guide was cloned under the control of a U6 promoter into a modified version of the pSpCas9(BB)-2A-Puro (PX459) V2.0 (Addgene, # 62988) plasmid, in which the ChB promoter was replaced with an EF1 $\alpha$  promoter, in order to optimize expression in human stem cells.  $1 \times 10^6$  cells were co-electroporated with 100 $\mu$ mol of ssODN and 10 $\mu$ g Cas9 plasmid using a BTX ECM 830 electroporator (100V, 5ms, 50ms interval, bipolar pulse). 24h after electroporation, cells were subjected to 0.5  $\mu$ g/ml Puromycin selection for 72h period of puromycin selection (Thermo Fisher, #A1113803). Surviving colonies were collected (36 colonies plus 3 pools of cells), and gDNA extracted from half the sample using QuickExtract (Lucigen, #QE09050). PCR was performed using primers flanking exon 2 and PCR products treated with EcoRI; a double cutting digestion pattern indicated successful donor-mediated HDR (Figure 1). Three candidate clones were identified (1 from ssODN, 2 from ssODN-Ph) using EcoRI screening, from 36 colonies screened (12.5% efficiency). The genotype of one clone (4A) with an EcoRI digestion pattern indicative of biallelic targeting, was confirmed by Sanger sequencing and shown to have homozygous modified alleles and was designated *NRL*<sup>-/-</sup> (mutation nomenclature obtained using <https://www.mutalyzer.nl/>, and described as follows:

NG\_011697.1(NRL\_v001):c.221\_222insAATTC ) p.(Trp74\*).

Off-target sites for the CRISPR/Cas9 sgRNA predicted by the software Benchling.com, based on Hsu et al<sup>56</sup> were investigated by amplifying genomic regions of  $\pm$  500 bp around the first 4 sites (see suppl. Table 3). PCR was performed using MyFi Polymerase (Bioline BIO-21117, according to manufacturer's instructions) and PCR amplicons purified using Monarch® PCR & DNA Cleanup Kit T1030S and Sanger sequenced (Source Bioscience);

files (.ab1) were aligned to the genomic sequences using Benchling software. Single-nucleotide polymorphism (SNP) microarray analysis performed using HumanCytoSNP-12 v2.1 BeadChip Kit from Illumina and Genomestudio 2.0 confirmed the edited line retained a normal digital karyotype.

### **Retinal differentiation**

Both parental MShef10 ESC and *NRL*<sup>-/-</sup> cells were subjected to retinal differentiation using a previously published protocol<sup>28</sup>. Briefly, cells were cultured in pluripotency supportive media, and were allowed to reach complete confluency; then they were cultured for 48h in media lacking FGF and TGF $\beta$ , to induce differentiation. On day three, Neural Inductive Media (NIM) was added to promote forebrain identity, and media was replaced thrice weekly. After three weeks, cells begin to form 3D rounded neuroepithelial structures termed Optic Vesicles (OVs), which protrude from the monolayer and grow over a patch of cells that form a retinal pigmented epithelium (RPE). Between weeks 4-7 OVs were manually excised from the plate and cultured in suspension in low attachment 96-well plates in Retinal Differentiation Medium, supplemented with Taurine and Retinoic Acid. OVs from independent passages were collected at several differentiation stages: week 7-8 (early differentiation) weeks 14-17 (middle differentiation), and 20-25 as late time points.

### **Immunohistochemistry**

Three to six OVs per sample were fixed in PBS/4% PFA for 30 minutes at R/T, followed by three washes with PBS of 5 minutes each. They were then cryopreserved by immersion in a PBS/30% sucrose solution for 1h at 4°C, or until sunk. Samples were embedded in OCT compound, frozen and stored at -80°C. 12 $\mu$ m cryosections were sliced, OCT compound removed by warming the slides for 10 minutes at 37°C, and blocked for 1h using



PBS/0.1% Triton-X and 10% species-specific serum. Primary antibodies were diluted to the appropriate concentration in blocking buffer, and incubated O/N at 4°C. Secondary antibodies were diluted in blocking buffer, and incubated for 2h at R/T. Nuclei were stained with a 5µg/ml DAPI solution for 5 minutes at R/T, and slides were mounted with ImmunoFluoroMount (GeneTex GTX3028) and sealed with nail polish. Slides were imaged using a LSM710 Zeiss Confocal microscope, images processed using Fiji software and figures assembled using Inkscape. Antibodies used are listed in Table 1.

### **VSX2 and Ki67-positive cell quantification**

The number of VSX2 positive and Ki67 positive cells was quantified in three fields of view per OV. Cells were manually labelled using an ROI tool on the Icy bioimage software (<http://icy.bioimageanalysis.org>) on three channels (DAPI, blue; VSX2, Green; Ki67, red). ROIs were automatically optimised using the Active Contours plugin; green or red channel ROIs were superimposed onto the blue (DAPI) channel to exclude false positive signals; (N = 1 differentiation, n = 3 OVs; for each genotype). Co-localised ROIs for DAPI /VSX2 or Ki67/VSX2 were counted and the percentage VSX2+/Ki67+ cells were calculated.

### **S-OPSIN-positive cells quantification**

The number of cells positive for S-OPSIN was quantified by randomly selecting three fields per OV structure using DAPI staining only to avoid bias, and then quantifying the number of positive cells stained with the specific antibody in a total of three fields per OVs, in nine or three samples of OVs from three or one independent differentiation experiments for *NRL*<sup>-/-</sup> and WT, respectively.

## Quantitative Real-Time PCR

Organoids were analyzed from four independent retinal organoid differentiations (N) of *NRL*<sup>-/-</sup> ESCs and three control MShef10 ESC (WT) differentiations; one to three samples (n) per time point for each differentiation, each sample consisting of a pool of three OVs, were flash frozen in dry ice for RNA preservation. Three independent passages of undifferentiated ESCs (control MShef10 and *NRL*<sup>-/-</sup>) were used as a day 0 control. RNA was extracted using the RNeasy Micro Kit (Qiagen, # 74004) adding the DNase treatment, and RNA measured using Nanodrop. 500ng of RNA was used for cDNA synthesis using the RevertAid H Minus First Strand cDNA Synthesis Kit (Thermo Scientific, # K1631). Quantitative Real-Time PCR (qRT-PCR) was performed in 20 $\mu$ l reactions, using 1 $\mu$ l cDNA, 0.25 $\mu$ M primers and SYBR™ Green PCR Master Mix (Thermo Scientific, #4309155). The reaction was run on a StepOnePlus™ Real-Time PCR System (Applied Biosystems, #4376600), with the parameters: 10' 95°C; 40x 15" 95°C and 1' 60°C followed by melting curve analysis. GAPDH was used as reference gene and Ct values were analyzed as previously described using Graphpad Prism software. Primers sequences are in Table 2.

## Statistical analysis

qRT-PCR and IHC data was analyzed using two-way ANOVA with multiple comparisons and Sidak's correction in Prism8 \*\*: p < 0.01, \*\*\*: p < 0.001, \*\*\*\*: p < 0.0001. N = independent differentiation experiments; n = separate organoid samples; Sets of OVs from at least 2 independent differentiation experiments for each genotype were analysed by qRT PCR and replicate numbers (N, n) are indicated in the Figure legends.

**Table 1. Antibodies list**

| <b>Antibody</b>      | <b>Cat. number</b>           | <b>Concentration</b> |
|----------------------|------------------------------|----------------------|
| <b>Primary</b>       |                              |                      |
| NRL                  | R&D AF2945                   | 1:100                |
| NR2E3                | R&D H7223                    | 1:500                |
| Cone arrestin (ARR3) | Novus Biologicals NBPI-37003 | 1:100                |
| CRX                  | Abnova H000014-06-M02        | 1:800                |
| Recoverin            | Abcam AB5585                 | 1:1000               |
| VSX2                 | Abcam AB9016                 | 1:400                |
| Ki67                 | Abcam AB15580                | 1:300                |
| ZO-1                 | Thermofisher 61-7300         | 1:300                |
| S-OPSIN              | Abcam AB5407                 | 1:350                |
| L/M-OPSIN            | Abcam AB5405                 | 1:200                |
| RXR $\gamma$         | Abcam AB15518                | 1:200                |
| Rhodopsin            | Merk O4886                   | 1:1000               |
| Synaptophysin        | Abcam AB8049                 | 1:500                |
| PSD95                | Abcam AB18258                | 1:200                |
| CACNA1F              | Merk HPA068379               | 1:200                |
| GFAP                 | Merk AB5804                  | 1:500                |
| RIBEYE (CtBP2)       | BD 612044                    | 1:500                |
| PKCa                 | Merk P5704                   | 1:10                 |
| SOX9                 | R&D AF3075                   | 1:500                |

|                              |                      |       |
|------------------------------|----------------------|-------|
| PAX6                         | Biolegend 901301     | 1:400 |
| <b>Secondary</b>             |                      |       |
| Alexa 594 Rabbit anti-goat   | Thermofisher A11080  | 1:800 |
| Alexa 594 Goat anti-mouse    | Thermofisher A11032  | 1:800 |
| Alexa 594 Donkey anti-rabbit | Thermofisher A121207 | 1:800 |
| Alexa 594 Goat anti-rabbit   | Thermofisher A11037  | 1:800 |
| Alexa 488 Donkey anti-sheep  | Thermofisher A11015  | 1:800 |
| Alexa 488 Donkey anti-rabbit | Thermofisher A21206  | 1:800 |
| Alexa 488 Donkey anti-mouse  | Thermofisher A21202  | 1:800 |
| Alexa 488 Goat anti-rabbit   | Thermofisher A11008  | 1:800 |

**Table 2. qRT-PCR primers list**

| Name                          | Sequence Forward        | Sequence Reverse       |
|-------------------------------|-------------------------|------------------------|
| <i>GAPDH</i>                  | AATCCCATCACCATCTTCCA    | TGGACTCCACGACGTA CTCA  |
| <i>CRX</i>                    | GCCCCACTATTCTGTCAACG    | GTCTGGGTACTGGGTCTTGG   |
| <i>VSX2</i>                   | TCATGGCGGAGTATGGGCT     | TCCAGCGACTTTTTGTGCATC  |
| <i>NRL</i>                    | CATGGCTACTACCCAGGGAGC   | GTTTAGCTCCCGCACAGACATC |
| <i>NR2E3</i>                  | AGCAGCGGGAAGCACTATG     | CCTGGCACCTGTAGATGAGC   |
| <i>THRB</i>                   | TGATGATGTGAACGACCAGAGT  | AGTAACTGGGGATGTACCCTTT |
| <i>RXR<math>\gamma</math></i> | CCGGATCTCTGGTTAAACACATC | GTCTTCCTTATCGTCCTCTTGA |
| <i>OPN1SW</i>                 | CCTGGCTACCTGGACCATTG    | TAGGACTCGCTGCGGTATTTG  |
| <i>OPN1MW</i>                 | CATCCGCAGGACAGCTATGAG   | GGAGCGATGTGGTAATTCGGG  |
| <i>ARR3</i>                   | CGGTGGAACCCATTGACGG     | TCCAAGTCATCACGGCCATAG  |
| <i>RHO</i>                    | ACAGGATGCAATTTGGAGGGC   | GCTCATGGGCTTACACACCA   |

|              |                         |                         |
|--------------|-------------------------|-------------------------|
| <i>MEF2C</i> | CTGGTGTAACACATCGACCTC   | GATTGCCATACCCGTTCCCT    |
| <i>GNGT1</i> | TCCCAAGGCTAGTGTGCATTGCT | ACCAGTGGATCCTCGCCAGATCG |
| <i>GRK7</i>  | TGCTGGGGAAAGGTGGTTTT    | GTCCAGTTTCTTACAGGCATACA |
| <i>PDE6H</i> | GCAGACTCGCCAATTCAAGAG   | TCTGTTCCCTAGCCCCTCCATT  |

**Table 3. CRISPR/Cas9 Off-target effects**

| Sequence                                       | PAM | Score    | Gene            | Chr   | Strand | Position  | Mismatches | On-target |
|------------------------------------------------|-----|----------|-----------------|-------|--------|-----------|------------|-----------|
| CAGGCCTGGAGGAGCTGTAC                           | TGG | 100      | ENSG00000129535 | chr14 | -1     | 24082633  | 0          | FALSE     |
| CAGG <b>T</b> CTGGAGGAGCTGTAG                  | AAG | 5.659286 |                 | chr9  | -1     | 132597790 | 2          | FALSE     |
| CAGGCCTG <b>T</b> AGGAGCTGT <b>C</b> C         | AGG | 1.662198 | ENSG00000171298 | chr17 | 1      | 80104569  | 2          | FALSE     |
| CAGG <b>G</b> CTGG <b>G</b> GGAGCTGTAG         | AAG | 1.474158 |                 | chr7  | -1     | 43197557  | 3          | FALSE     |
| <b>G</b> AAC <b>C</b> CT <b>A</b> GAGGAGCTGTAC | CAG | 1.457521 |                 | chr1  | -1     | 6462730   | 4          | FALSE     |

**Table 4. Primers to amplify off-target regions**

| Off-target site | Sequence Forward       | Sequence Reverse       | Amplicon (bp) |
|-----------------|------------------------|------------------------|---------------|
| # 1             | TAATTGCCTACAGAAGCGGTGC | AGCCAGGAAAGGTGGTGATGAT | 359           |
| #2              | CCTGCTGGAGCTTTTCTCGCCC | TGCTGGTGAGCTGGGTGAGTCT | 403           |
| #3              | TCCGCTGCCCTAGACCACCTTC | GGCCACGGTTATGTTGCCAGT  | 395           |
| #4              | CGTGCCAAGCTCCAGGGATCAT | CCTTGTGGTCCCCCTCCTGCTT | 396           |
